# Supplementary material for: Chitosan-stabilized platinum nanoparticles as effective oxidase mimics for colorimetric detection of acid phosphatase
Source: Royal Society of Chemistry journal article supplement (doi:10.1039/c7nr03399k), 2017-01-01
Supplement: c7nr03399k1.pdf [file c7nr03399k1.pdf]

## Supporting Information

### **Chitosan-Stabilized Platinum Nanoparticles as Effective Oxidase Mimics for Colorimetric Detection of Acid Phosphatase**

Hao-Hua Deng,<sup>a‡</sup> Xiu-Ling Lin,<sup>a‡</sup> Yin-Huan Liu,<sup>b</sup> Ke-Lin Li,<sup>a</sup> Qiong-Qiong Zhuang,<sup>a</sup> Hua-Ping Peng,<sup>a</sup> Ai-Lin Liu,<sup>a</sup> Xing-Hua Xia,<sup>c</sup> Wei Chen<sup>\*a</sup>

<sup>a</sup> Nano Medical Technology Research Institute, Department of Pharmaceutical Analysis, School of Pharmacy, Fujian Medical University, Fuzhou 350004, China

<sup>b</sup> Department of Laboratory Medicine, Second Hospital of Fuzhou, Fuzhou 350007, China

<sup>c</sup> State Key Laboratory of Analytical Chemistry for Life Science, School of Chemistry and Chemical Engineering, Nanjing University, Nanjing 210093, China.

\* Tel./Fax: +86 591 22862016. E-mail: [chenandhu@163.com](mailto:chenandhu@163.com).

‡These authors contributed equally.

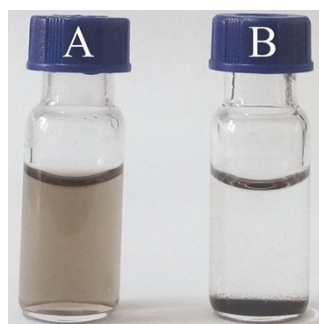

**Fig. S1** Photographs of (A) Ch-PtNPs and (B) bare PtNPs placed at room temperature for 7 days.

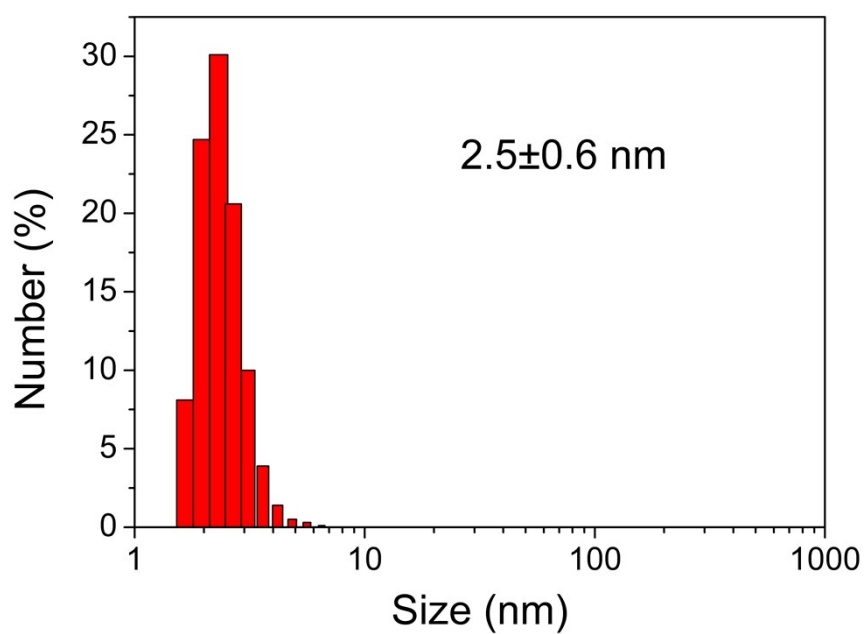

**Fig. S2** Dynamic light scattering spectrum of Ch-PtNPs.

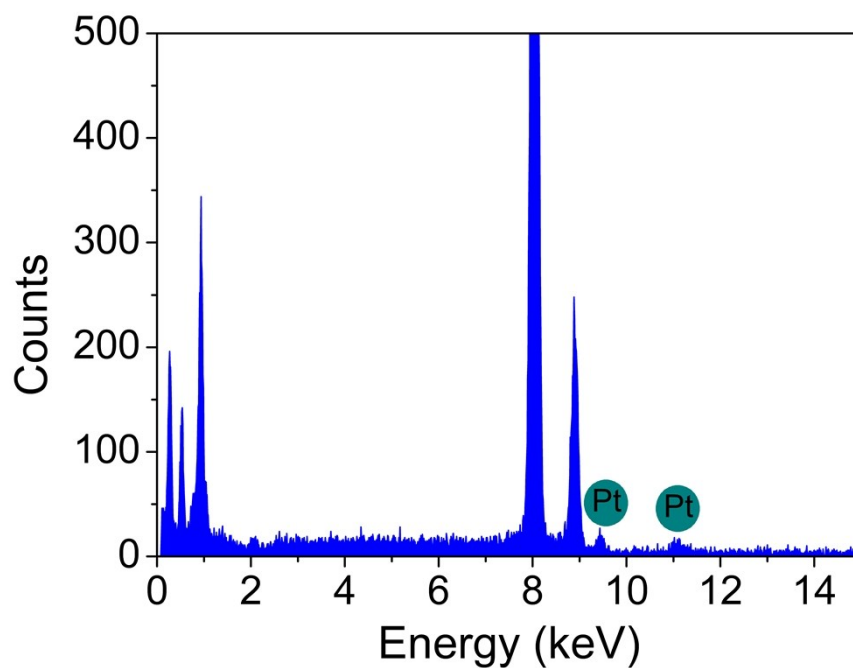

**Fig. S3** EDS spectrum of Ch-PtNPs sample.

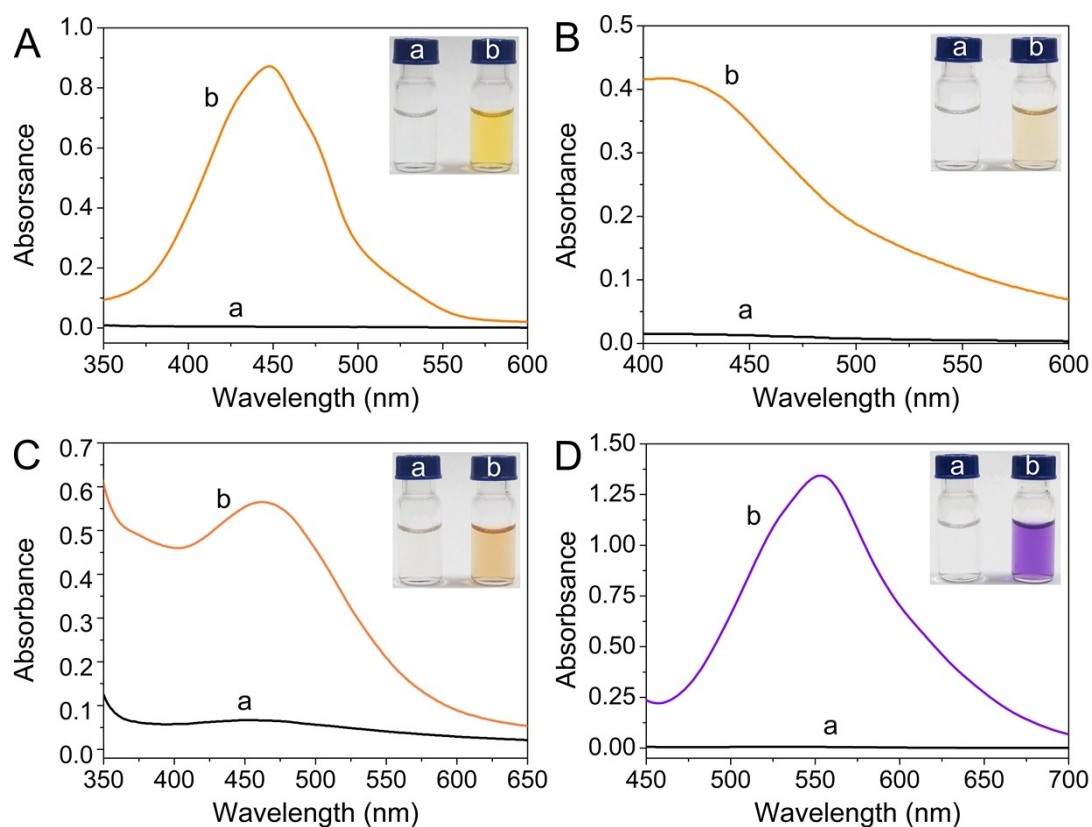

**Fig. S4** UV-vis spectra of (A) OPD, (B) pyrogallol, (C) DAB, and (D) 4-AAP/TOPS catalyzed by Ch-PtNPs: (a) substrate only, (b) substrate + Ch-PtNPs. Inset: the corresponding photographs.

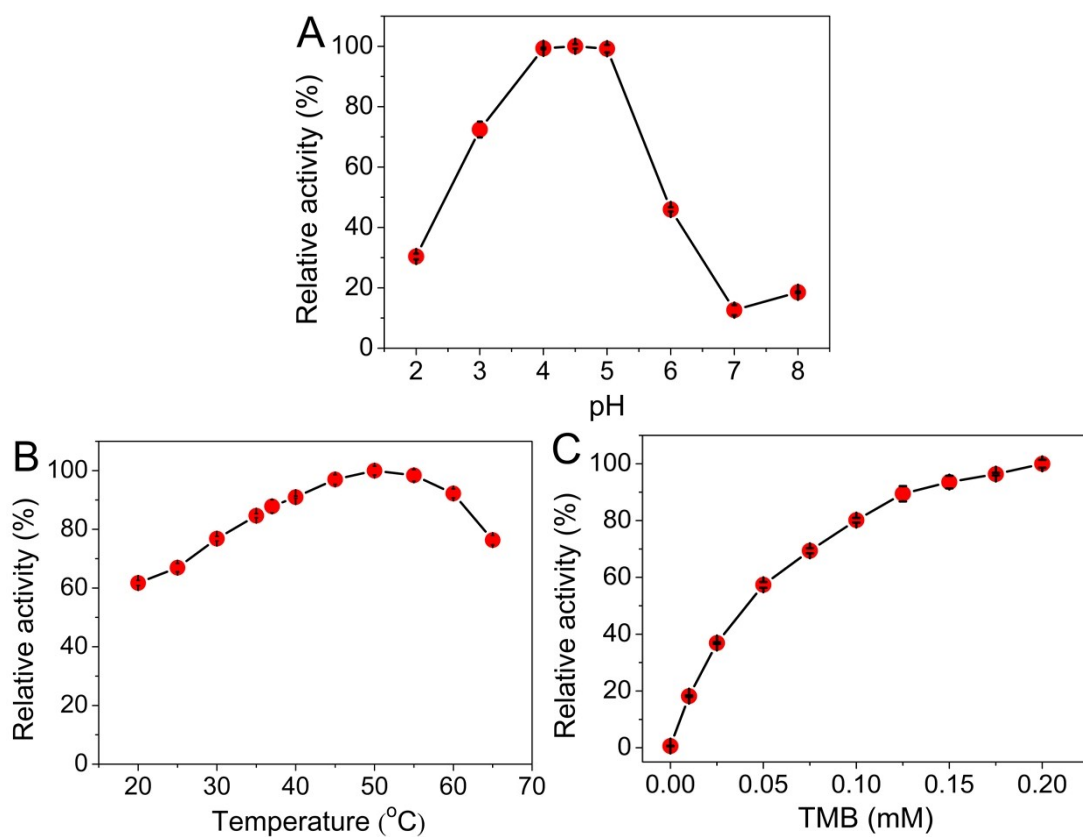

**Fig. S5** Dependency of the relative activity of Ch-PtNPs toward oxidation on (A) pH, (B) temperature, and (C) concentration of TMB.

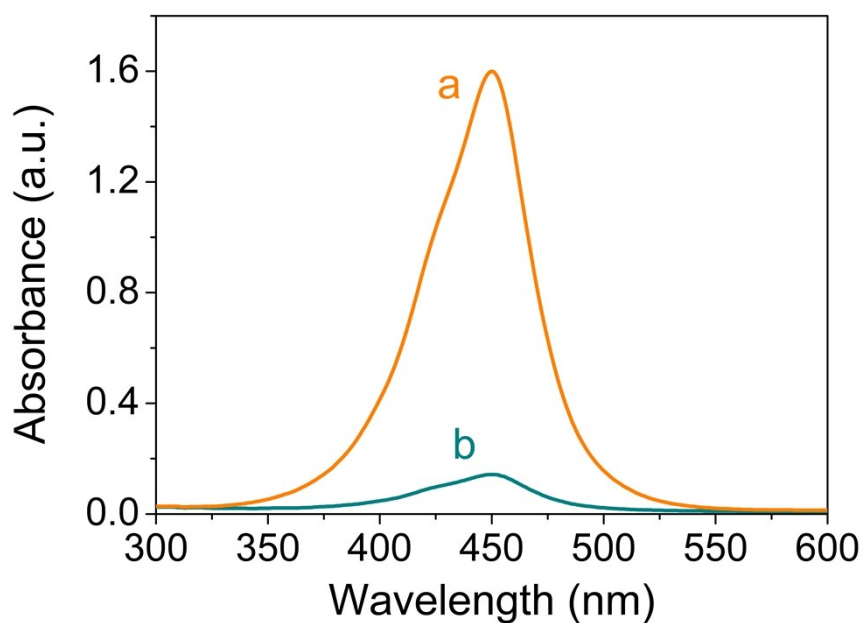

**Fig. S6** Absorption spectra of a solution containing TMB and Ch-PtNPs under (a) aerobic and (b) N<sub>2</sub>-saturated conditions.

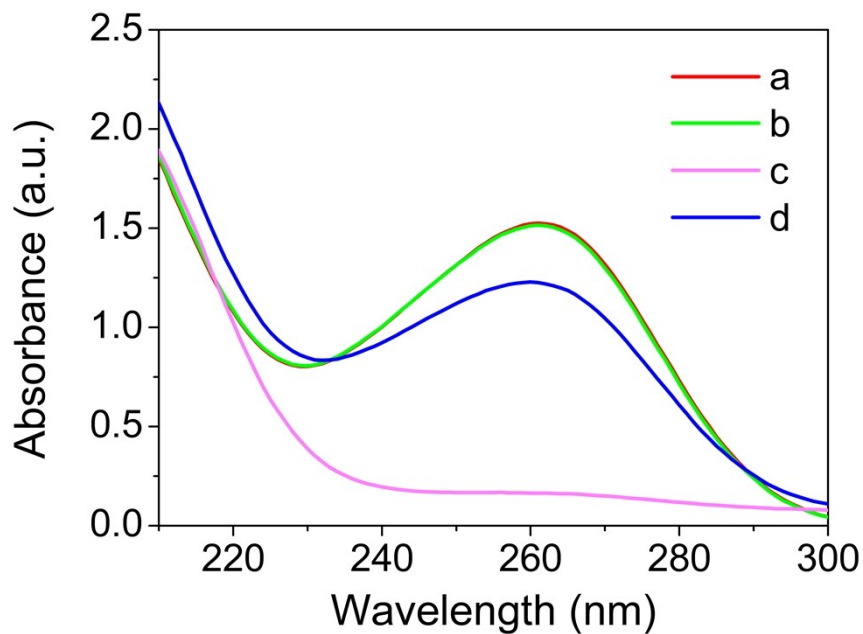

**Fig. S7** Absorption spectra of AA under (a) aerobic and (b) N<sub>2</sub>-saturated conditions and AA + Ch-PtNPs under (c) aerobic and (d) N<sub>2</sub>-saturated conditions. The incubation times were all 3 min.

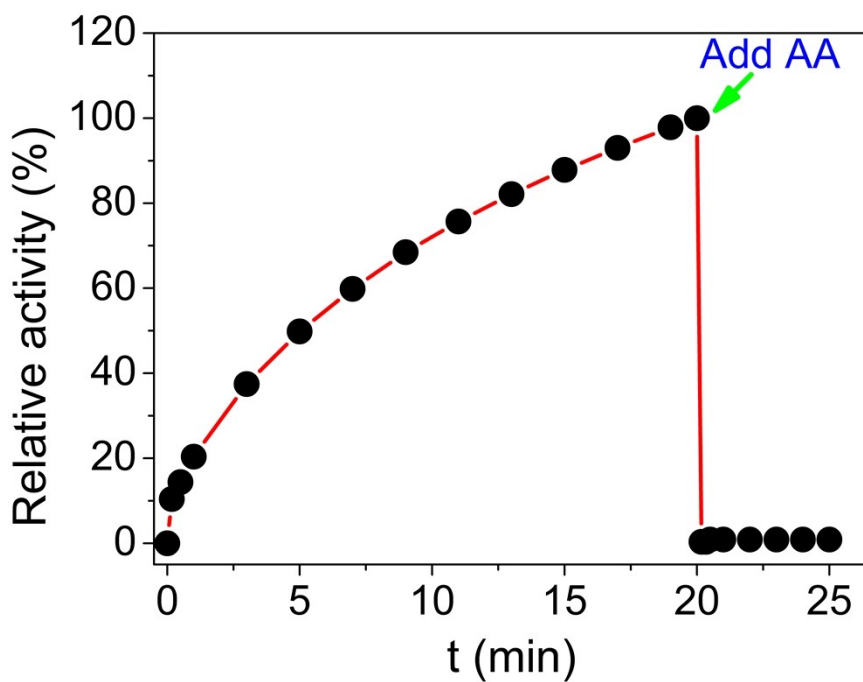

**Fig. S8** Time-dependent absorbance for Ch-PtNPs-catalyzed TMB oxidation and AA-mediated reducing of oxidized TMB.

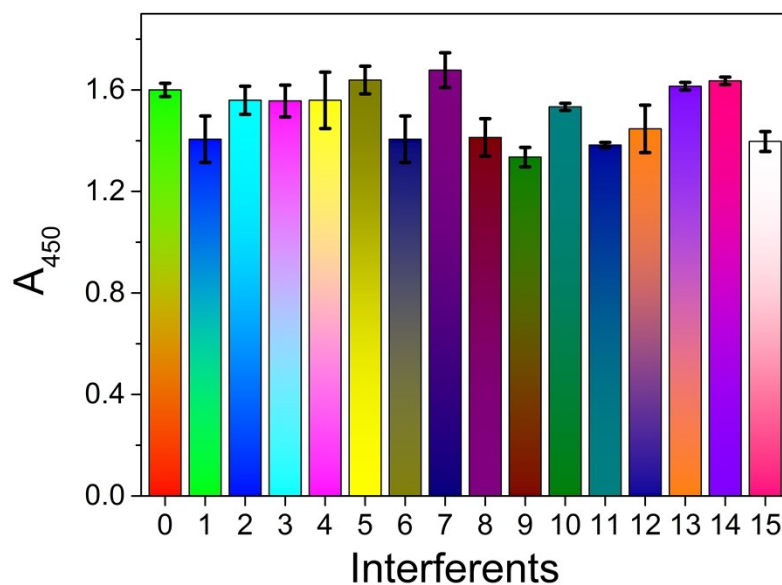

**Fig. S9** Selectivity of the proposed method for ACP detection. X-axis labels correspond to (0) blank, (1)  $\text{Cl}^-$ , (2)  $\text{H}_2\text{PO}_4^-$ , (3)  $\text{HCO}_3^-$ , (4)  $\text{NO}_3^-$ , (5)  $\text{SO}_4^{2-}$ , (6)  $\text{Na}^+$ , (7)  $\text{Mg}^{2+}$ , (8)  $\text{K}^+$ , (9)  $\text{Ca}^{2+}$ , (10)  $\text{Zn}^{2+}$ , (11) creatinine, (12) creatine, (13) glucose, (14) lactose, and (15) acetylcholine. The concentrations of creatinine and creatine were 0.1 mM, and the others were 1 mM.
